# Supplementary material for: Microemulsions of Nonionic Surfactant with Water and Various Homologous Esters: Preparation, Phase Transitions, Physical Property Measurements, and Application for Extraction of Tricyclic Antidepressant Drugs from Aqueous Media
Source: MDPI journal article supplement (doi:10.3390/nano13162311), 2023-08-11
Supplement: s1 [file s1]

*Supplementary Information*

# **Microemulsions of Nonionic Surfactant with Water and Various Homologous Esters: Preparation, Phase Transitions, Physical Property Measurements, and Application for Extraction of Tricyclic Antidepressant Drugs from Aqueous Media**

**Radu C. Racovita <sup>1,\*</sup>, Maria D. Ciuca <sup>1</sup>, Daniela Catana <sup>1</sup>, Cezar Comanescu <sup>1,2,3,\*</sup> and Oana Ciocirlan <sup>1</sup>**

<sup>1</sup> Department of Inorganic Chemistry, Physical Chemistry and Electrochemistry, Faculty of Chemical Engineering and Biotechnologies, National University of Science and Technology Politehnica Bucharest, 1-7 Gh. Polizu St., District 1, 011061 Bucharest, Romania; maria\_daniela.ciuca@upb.ro (M.D.C.); daniela.catana2911@upb.ro (D.C.); oana.ciocirlan@upb.ro (O.C.)

<sup>2</sup> National Institute of Materials Physics, 405A Atomistilor St., 077125 Magurele, Romania

<sup>3</sup> Faculty of Physics, University of Bucharest, 405 Atomistilor St., 077125 Magurele, Romania

\* Correspondence: radu.racovita@upb.ro (R.C.R.); cezar.comanescu@infim.ro (C.C.)

Supplementary Figures:

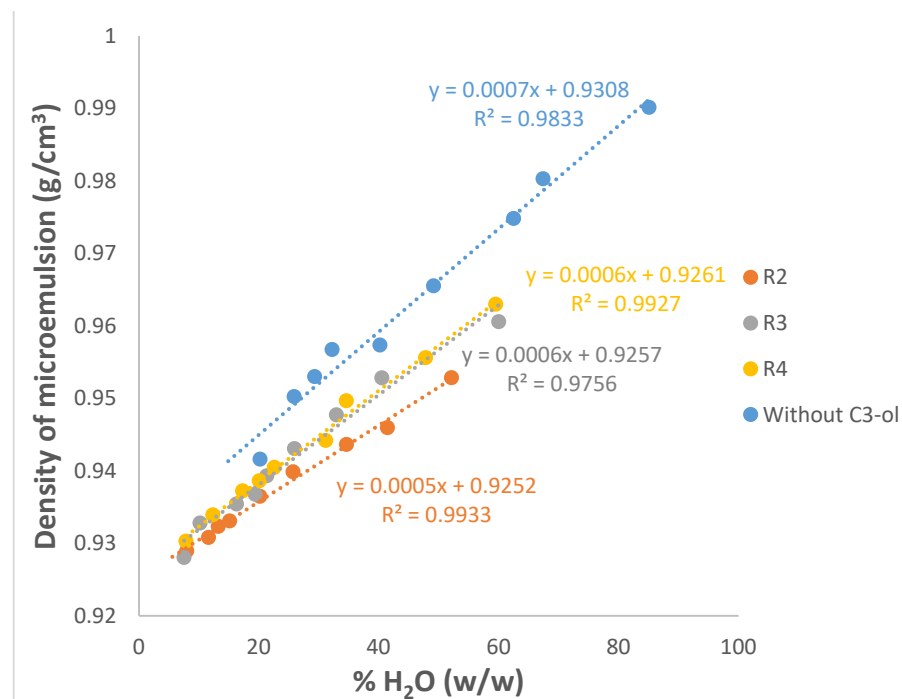

**Figure S1.** Variation of densities as a function of the weight % of H<sub>2</sub>O incorporated for Winsor IV microemulsion systems H<sub>2</sub>O/Brij 30/ETPR without and with different proportions of added C3-ol co-surfactant. R is the volumetric ratio H<sub>2</sub>O/C3-ol. t=25°C.

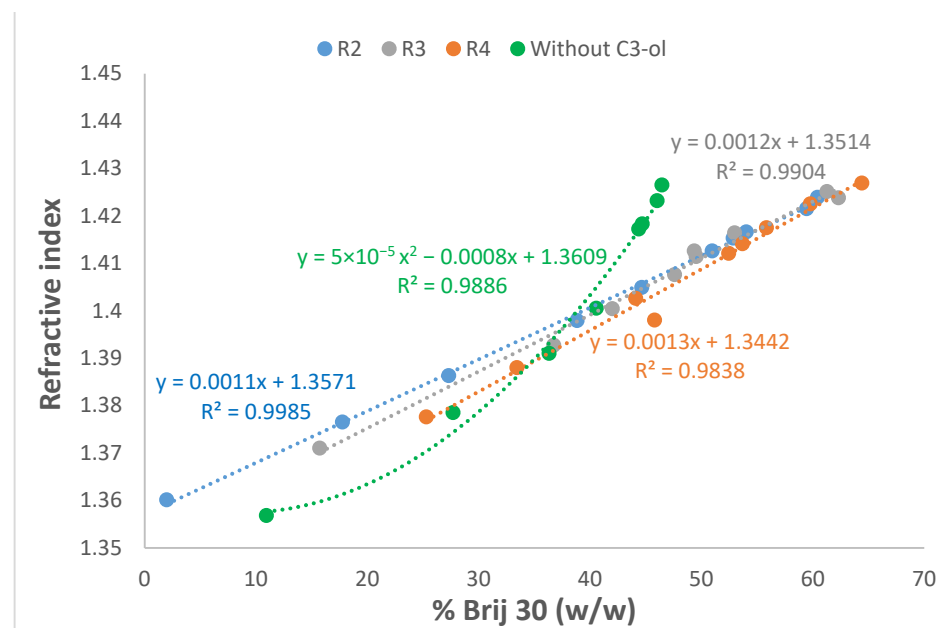

**Figure S2.** Variation of refractive indices as a function of the weight % of H<sub>2</sub>O incorporated for Winsor IV microemulsion systems H<sub>2</sub>O/Brij 30/ETPR without and with different proportions of added C3-ol co-surfactant. R is the volumetric ratio H<sub>2</sub>O/C3-ol. t=25°C.

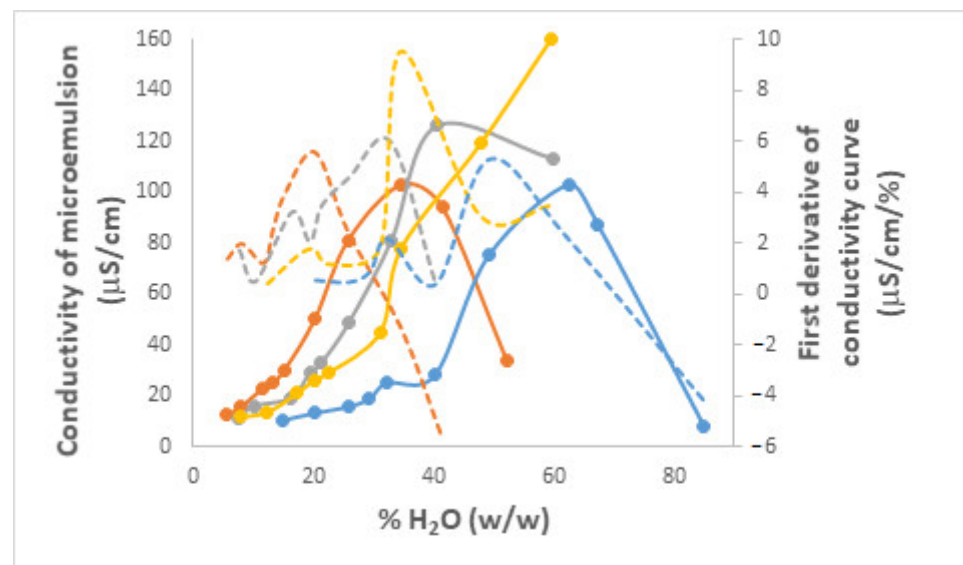

**Figure S3.** Electrical conductivity variation curves (full) and their first order derivatives (dashed) as a function of the weight % of H<sub>2</sub>O incorporated for Winsor IV microemulsion systems H<sub>2</sub>O/Brij 30/ETPR without and with different proportions of added C3-ol co-surfactant. R is the volumetric ratio H<sub>2</sub>O/C3-ol, color coded as follows: R 2 (orange), R 3 (grey), R 4 (yellow), Without C3-ol (blue).  $t=25^{\circ}\text{C}$ .

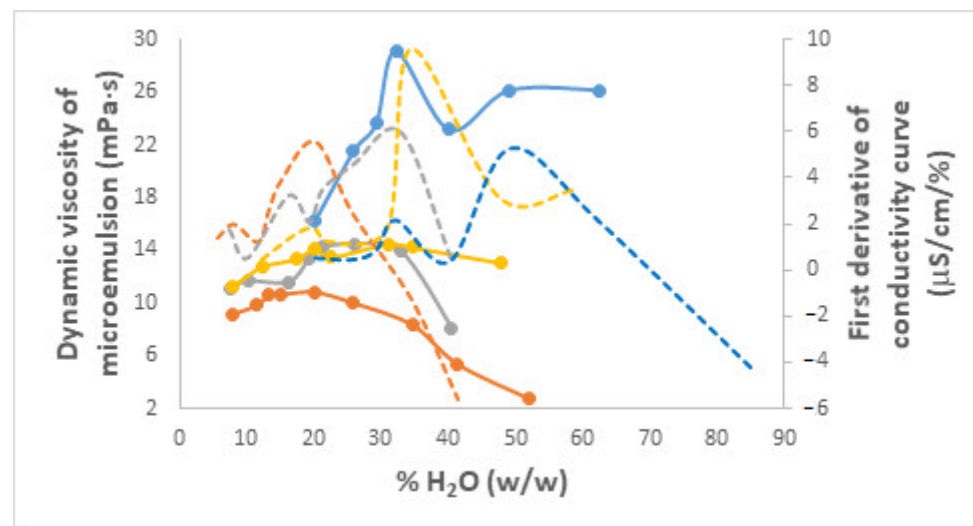

**Figure S4.** Dynamic viscosity variation curves (full) and the first order derivatives of conductivity curves (dashed) as a function of the weight % of H<sub>2</sub>O incorporated for Winsor IV microemulsion systems H<sub>2</sub>O/Brij 30/ETPR without and with different proportions of added C3-ol co-surfactant. R is the volumetric ratio H<sub>2</sub>O/C3-ol, color coded as follows: R 2 (orange), R 3 (grey), R 4 (yellow), Without C3-ol (blue).  $t=25^{\circ}\text{C}$ .

Supplementary Tables:

**Table S1.** PRAC-based Winsor IV microemulsion densities calculated based on a weighted average of the densities of pure components, with mass percentages taken as weights, experimental densities, and relative % deviations of experimental densities from the calculated ones. R represents the volumetric ratio between water and co-surfactant C3-ol in the case of four-component systems.

| Sample no. | Calculated density, g/cm <sup>3</sup> | Measured density, g/cm <sup>3</sup> | Dev., % | Calculated density, g/cm <sup>3</sup> | Measured density, g/cm <sup>3</sup> | Dev., % | Calculated density, g/cm <sup>3</sup> | Measured density, g/cm <sup>3</sup> | Dev., % | Calculated density, g/cm <sup>3</sup> | Measured density, g/cm <sup>3</sup> | Dev., % |
|------------|---------------------------------------|-------------------------------------|---------|---------------------------------------|-------------------------------------|---------|---------------------------------------|-------------------------------------|---------|---------------------------------------|-------------------------------------|---------|
|            | <i>Without C3-ol</i>                  |                                     |         | <i>R = 2</i>                          |                                     |         | <i>R = 3</i>                          |                                     |         | <i>R = 4</i>                          |                                     |         |
| 1          | 0.98686                               | 0.98957                             | 0.275   | 0.93532                               | 0.95403                             | 2.000   | 0.95002                               | 0.96122                             | 1.179   | 0.95869                               | 0.96394                             | 0.547   |
| 2          | 0.98057                               | 0.98304                             | 0.252   | 0.93445                               | 0.94596                             | 1.232   | 0.94778                               | 0.95664                             | 0.935   | 0.95128                               | 0.95597                             | 0.493   |
| 3          | 0.97323                               | 0.97613                             | 0.298   | 0.93300                               | 0.94239                             | 1.006   | 0.94585                               | 0.95368                             | 0.828   | 0.94653                               | 0.95063                             | 0.433   |
| 4          | 0.96420                               | 0.96521                             | 0.104   | 0.93182                               | 0.93715                             | 0.572   | 0.94267                               | 0.9485                              | 0.618   | 0.94263                               | 0.94485                             | 0.235   |
| 5          | 0.95680                               | 0.95737                             | 0.059   | 0.92940                               | 0.93455                             | 0.555   | 0.94029                               | 0.94443                             | 0.440   | 0.93935                               | 0.94064                             | 0.137   |
| 6          | 0.95042                               | 0.95551                             | 0.536   | 0.92848                               | 0.92866                             | 0.019   | 0.93725                               | 0.93955                             | 0.245   | 0.93798                               | 0.93838                             | 0.043   |
| 7          | 0.94727                               | 0.95219                             | 0.520   | 0.92869                               | 0.92558                             | -0.335  | 0.93683                               | 0.93808                             | 0.133   | 0.93703                               | 0.93653                             | -0.053  |
| 8          | 0.94391                               | 0.94909                             | 0.548   | -                                     | -                                   | -       | 0.93611                               | 0.93645                             | 0.036   | 0.93481                               | 0.93324                             | -0.168  |
| 9          | 0.93663                               | 0.94333                             | 0.716   | -                                     | -                                   | -       | 0.93361                               | 0.93317                             | -0.048  | 0.93137                               | 0.92955                             | -0.196  |
| 10         | 0.92852                               | 0.93887                             | 1.115   | -                                     | -                                   | -       | 0.93289                               | 0.92942                             | -0.372  | 0.95869                               | 0.96394                             | 0.547   |

**Table S2.** ETPR-based Winsor IV microemulsion densities calculated based on a weighted average of the densities of pure components, with mass percentages taken as weights, experimental densities, and relative % deviations of experimental densities from the calculated ones. R represents the volumetric ratio between water and co-surfactant C3-ol in the case of four-component systems.

| Sample no. | Calculated density, g/cm <sup>3</sup> | Measured density, g/cm <sup>3</sup> | Dev., % | Calculated density, g/cm <sup>3</sup> | Measured density, g/cm <sup>3</sup> | Dev., % | Calculated density, g/cm <sup>3</sup> | Measured density, g/cm <sup>3</sup> | Dev., % | Calculated density, g/cm <sup>3</sup> | Measured density, g/cm <sup>3</sup> | Dev., % |
|------------|---------------------------------------|-------------------------------------|---------|---------------------------------------|-------------------------------------|---------|---------------------------------------|-------------------------------------|---------|---------------------------------------|-------------------------------------|---------|
|            | <i>Without C3-ol</i>                  |                                     |         | <i>R = 2</i>                          |                                     |         | <i>R = 3</i>                          |                                     |         | <i>R = 4</i>                          |                                     |         |
| 1          | 0.98749                               | 0.99013                             | 0.268   | 0.92006                               | 0.95284                             | 3.562   | 0.96903                               | 0.96058                             | -0.872  | 0.96975                               | 0.96297                             | -0.699  |
| 2          | 0.97750                               | 0.98030                             | 0.286   | 0.91914                               | 0.94596                             | 2.917   | 0.96737                               | 0.95282                             | -1.504  | 0.96838                               | 0.95561                             | -1.319  |
| 3          | 0.97322                               | 0.97482                             | 0.164   | 0.91765                               | 0.94363                             | 2.832   | 0.96649                               | 0.94773                             | -1.941  | 0.96710                               | 0.94966                             | -1.803  |
| 4          | 0.96395                               | 0.96553                             | 0.164   | 0.91422                               | 0.93987                             | 2.806   | 0.96574                               | 0.94307                             | -2.347  | 0.96636                               | 0.94418                             | -2.296  |
| 5          | 0.95680                               | 0.95735                             | 0.057   | 0.90987                               | 0.93649                             | 2.926   | 0.96508                               | 0.93932                             | -2.669  | 0.96556                               | 0.94049                             | -2.597  |
| 6          | 0.95041                               | 0.95674                             | 0.666   | 0.90757                               | 0.93309                             | 2.811   | 0.96476                               | 0.93676                             | -2.902  | 0.96523                               | 0.93862                             | -2.757  |
| 7          | 0.94740                               | 0.95301                             | 0.593   | 0.90590                               | 0.93233                             | 2.918   | 0.96450                               | 0.93542                             | -3.015  | 0.96492                               | 0.93723                             | -2.870  |
| 8          | 0.94448                               | 0.95024                             | 0.609   | 0.90376                               | 0.93080                             | 2.991   | 0.96421                               | 0.93279                             | -3.259  | 0.96438                               | 0.93392                             | -3.159  |
| 9          | 0.93852                               | 0.94161                             | 0.330   | 0.90352                               | 0.92896                             | 2.816   | 0.96367                               | 0.92804                             | -3.697  | 0.96398                               | 0.93030                             | -3.494  |

**Table S3.** Particle diameters and polydispersity indices (PDIs) for micelles of Winsor IV microemulsions prepared with ETPR as ester oil, water, Brij 30, without and with isopropanol (C3-ol) added as co-surfactant. R represent the volumetric ratio between water and C3-ol. The initial volumetric ratio between water and ester ( $V_{\text{water}}/V_{\text{ester}}$ ) is also given in the first column. Results are reported as average  $\pm$  standard deviation (n=3).

| $\frac{V_{\text{Water}}}{V_{\text{Ester}}}$ | Particle diameter, nm | PDI             |
|---------------------------------------------|-----------------------|-----------------|-----------------------|-----------------|-----------------------|-----------------|-----------------------|-----------------|
|                                             | <i>Without C3-ol</i>  |                 | <i>R = 2</i>          |                 | <i>R = 3</i>          |                 | <i>R = 4</i>          |                 |
| 19.0                                        | gel                   |                 | 79.93 $\pm$ 1.18      | 0.23 $\pm$ 0.03 | 64.45 $\pm$ 0.08      | 0.08 $\pm$ 0.08 | 35.50 $\pm$ 0.31      | 0.09 $\pm$ 0.02 |
| 5.7                                         | 89.1 $\pm$ 7.21       | 0.27 $\pm$ 0.02 | 35.98 $\pm$ 0.70      | 0.18 $\pm$ 0.04 | 23.73 $\pm$ 0.22      | 0.19 $\pm$ 0.01 | 30.44 $\pm$ 0.40      | 0.12 $\pm$ 0.04 |
| 3.0                                         | 61.57 $\pm$ 1.04      | 0.09 $\pm$ 0.01 | 37.27 $\pm$ 5.43      | 0.29 $\pm$ 0.08 | 24.74 $\pm$ 1.01      | 0.27 $\pm$ 0.03 | 27.65 $\pm$ 0.51      | 0.22 $\pm$ 0.01 |
| 1.9                                         | 55.74 $\pm$ 6.20      | 0.19 $\pm$ 0.03 | 31.56 $\pm$ 4.38      | 0.27 $\pm$ 0.06 | 30.73 $\pm$ 0.98      | 0.24 $\pm$ 0.05 | 29.43 $\pm$ 0.52      | 0.29 $\pm$ 0.03 |
